# Supplementary material for: Skull Thickness Calculation Using Thermal Analysis and Finite Elements
Source: MDPI journal article supplement (doi:10.3390/app112110483), 2021-11-08
Supplement: s1 [file s1]

| No | Gender | Age   | Frames | PixelSpaceX | PixelSpaceY | PixelSpaceZ | Slice Thickness |
|----|--------|-------|--------|-------------|-------------|-------------|-----------------|
| 1  | F      | 0,17  | 610    | 0,537       | 0,537       | 0,5         | 0,5             |
| 2  | M      | 16    | 742    | 0,546       | 0,546       | 0,5         | 0,5             |
| 3  | F      | 0,17  | 584    | 0,537       | 0,537       | 0,5         | 0,5             |
| 4  | F      | 16    | 305    | 0,488281    | 0,488281    | 0,625       | 0,625           |
| 5  | M      | 0,07  | 388    | 0,546       | 0,546       | 0,5         | 0,5             |
| 6  | F      | 12    | 292    | 0,582031    | 0,582031    | 0,625       | 0,625           |
| 7  | F      | 0,08  | 513    | 0,546       | 0,546       | 0,5         | 0,5             |
| 8  | M      | 0,07  | 403    | 0,546       | 0,546       | 0,5         | 0,5             |
| 9  | M      | 0,05  | 434    | 0,383       | 0,383       | 0,5         | 0,5             |
| 10 | F      | 0,04  | 462    | 0,358       | 0,358       | 0,5         | 0,5             |
| 11 | F      | 0,03  | 483    | 0,546       | 0,546       | 0,5         | 0,5             |
| 12 | F      | 0,04  | 498    | 0,383       | 0,383       | 0,5         | 0,5             |
| 13 | F      | 0,04  | 501    | 0,537       | 0,537       | 0,5         | 0,5             |
| 14 | M      | 0,07  | 584    | 0,537       | 0,537       | 0,5         | 0,5             |
| 15 | F      | 0,04  | 493    | 0,449       | 0,449       | 0,5         | 0,5             |
| 16 | M      | 0,05  | 667    | 0,537       | 0,537       | 0,5         | 0,5             |
| 17 | M      | 14    | 766    | 0,546       | 0,546       | 0,5         | 0,625           |
| 18 | F      | 0,07  | 446    | 0,537       | 0,537       | 0,5         | 0,5             |
| 19 | M      | 0,02  | 369    | 0,537       | 0,537       | 0,5         | 0,5             |
| 20 | F      | 0,05  | 323    | 0,390625    | 0,390625    | 0,5         | 0,9             |
| 21 | F      | 15    | 769    | 0,546       | 0,546       | 0,5         | 0,5             |
| 22 | M      | 0,04  | 504    | 0,38        | 0,38        | 0,5         | 0,5             |
| 23 | M      | 0,04  | 467    | 0,371       | 0,371       | 0,5         | 0,5             |
| 24 | F      | 0,04  | 439    | 0,537       | 0,537       | 0,5         | 0,5             |
| 25 | M      | 0,03  | 502    | 0,364       | 0,364       | 0,5         | 0,5             |
| 26 | M      | 0,75  | 498    | 0,468       | 0,468       | 0,5         | 0,5             |
| 27 | M      | 16    | 303    | 0,492188    | 0,492188    | 0,625       | 0,625           |
| 28 | M      | 1,00  | 523    | 0,625       | 0,625       | 0,5         | 0,5             |
| 29 | M      | 14    | 296    | 0,488281    | 0,488281    | 0,625       | 0,625           |
| 30 | M      | 0,50  | 591    | 0,537       | 0,537       | 0,5         | 0,5             |
| 31 | M      | 0,33  | 559    | 0,546       | 0,546       | 0,5         | 0,5             |
| 32 | F      | 1,00  | 598    | 0,537       | 0,537       | 0,5         | 0,625           |
| 33 | F      | 1,00  | 224    | 0,316406    | 0,316406    | 0,625       | 0,625           |
| 34 | F      | 1,00  | 231    | 0,458984    | 0,458984    | 0,625       | 0,625           |
| 35 | M      | 0,58  | 445    | 0,412       | 0,412       | 0,5         | 0,5             |
| 36 | M      | 0,58  | 584    | 0,449       | 0,449       | 0,5         | 0,5             |
| 37 | M      | 13    | 650    | 0,546       | 0,546       | 0,5         | 0,5             |
| 38 | M      | 10,00 | 275    | 0,488281    | 0,488281    | 2,5         | 0,625           |
| 39 | F      | 6,00  | 624    | 0,537       | 0,537       | 0,5         | 0,5             |
| 40 | M      | 9,00  | 567    | 0,546       | 0,546       | 0,5         | 0,5             |
| 41 | M      | 10,00 | 279    | 0,488281    | 0,488281    | 0,625       | 0,625           |
| 42 | M      | 4,00  | 723    | 0,537       | 0,537       | 0,5         | 0,5             |
| 43 | F      | 6,00  | 288    | 0,488281    | 0,488281    | 0,625       | 0,625           |
| 44 | M      | 3,00  | 606    | 0,537       | 0,537       | 0,5         | 0,5             |
| 45 | M      | 4,00  | 765    | 0,537       | 0,537       | 0,5         | 0,5             |
| 46 | F      | 1,75  | 681    | 0,468       | 0,468       | 0,5         | 0,5             |
| 47 | F      | 6,00  | 330    | 0,488281    | 0,488281    | 0,625       | 0,625           |
| 48 | M      | 7,00  | 635    | 0,537       | 0,537       | 0,5         | 0,5             |
| 49 | F      | 9,00  | 277    | 0,488281    | 0,488281    | 0,625       | 0,625           |

|    |   |       |     |          |          |       |       |
|----|---|-------|-----|----------|----------|-------|-------|
| 50 | M | 5,00  | 569 | 0,537    | 0,537    | 0,5   | 0,5   |
| 51 | F | 15    | 423 | 0,466797 | 0,466797 | 0,5   | 0,625 |
| 52 | F | 1,33  | 607 | 0,537    | 0,537    | 0,5   | 0,5   |
| 53 | F | 8,00  | 256 | 0,488281 | 0,488281 | 0,625 | 0,625 |
| 54 | M | 7,00  | 622 | 0,537    | 0,537    | 0,5   | 0,5   |
| 55 | F | 2,00  | 192 | 0,488281 | 0,488281 | 0,625 | 0,625 |
| 56 | F | 6,00  | 254 | 0,451172 | 0,451172 | 0,625 | 0,625 |
| 57 | F | 2,00  | 256 | 0,488281 | 0,488281 | 0,625 | 0,625 |
| 58 | F | 4,00  | 271 | 0,625    | 0,625    | 0,5   | 0,625 |
| 59 | F | 8,00  | 147 | 0,439453 | 0,439453 | 1,25  | 1,25  |
| 60 | F | 7,00  | 295 | 0,591797 | 0,591797 | 0,625 | 0,625 |
| 61 | M | 2,00  | 588 | 0,546    | 0,546    | 0,5   | 0,5   |
| 62 | F | 3,00  | 737 | 0,537    | 0,537    | 0,5   | 0,5   |
| 63 | F | 7,00  | 249 | 0,488281 | 0,488281 | 0,625 | 0,625 |
| 64 | F | 6,00  | 266 | 0,488281 | 0,488281 | 0,625 | 0,625 |
| 65 | F | 7,00  | 598 | 0,546    | 0,546    | 0,5   | 0,5   |
| 66 | M | 6,00  | 653 | 0,537    | 0,537    | 0,5   | 0,5   |
| 67 | M | 8,00  | 558 | 0,537    | 0,537    | 0,5   | 0,5   |
| 68 | M | 8,00  | 224 | 0,369141 | 0,369141 | 0,625 | 0,625 |
| 69 | F | 5,00  | 263 | 0,369141 | 0,369141 | 2,5   | 0,625 |
| 70 | M | 2,00  | 471 | 0,537    | 0,537    | 0,5   | 0,625 |
| 71 | F | 5,00  | 473 | 0,376953 | 0,376953 | 0,5   | 0,9   |
| 72 | M | 3,00  | 290 | 0,625    | 0,625    | 0,625 | 0,625 |
| 73 | M | 5,00  | 268 | 0,478516 | 0,478516 | 2,5   | 0,625 |
| 74 | F | 5,00  | 600 | 0,537    | 0,537    | 0,5   | 0,5   |
| 75 | F | 4,00  | 287 | 0,488281 | 0,488281 | 0,625 | 0,625 |
| 76 | F | 7,00  | 233 | 0,488281 | 0,488281 | 0,625 | 0,625 |
| 77 | M | 10,00 | 233 | 0,488281 | 0,488281 | 0,625 | 0,625 |
| 78 | M | 2,00  | 651 | 0,43     | 0,43     | 0,5   | 0,5   |
| 79 | F | 4,00  | 517 | 0,463    | 0,463    | 0,5   | 0,5   |
| 80 | M | 8,00  | 609 | 0,546    | 0,546    | 0,5   | 0,5   |
| 81 | F | 2,00  | 637 | 0,537    | 0,537    | 0,5   | 1     |
| 82 | M | 3,00  | 264 | 0,488281 | 0,488281 | 0,625 | 0,625 |
| 83 | F | 3,00  | 233 | 0,488281 | 0,488281 | 0,625 | 0,625 |
| 84 | M | 16,00 | 742 | 0,546    | 0,546    | 0,5   | 0,5   |
| 85 | M | 16,00 | 305 | 0,488281 | 0,488281 | 0,625 | 0,625 |
| 86 | M | 12,00 | 292 | 0,582031 | 0,582031 | 0,625 | 0,625 |
| 87 | F | 14,00 | 766 | 0,546    | 0,546    | 0,5   | 0,625 |
| 88 | F | 15,00 | 769 | 0,546    | 0,546    | 0,5   | 0,5   |
| 89 | M | 16,00 | 303 | 0,492188 | 0,492188 | 0,625 | 0,625 |
| 90 | F | 14,00 | 296 | 0,488281 | 0,488281 | 0,625 | 0,625 |
| 91 | M | 13,00 | 650 | 0,546    | 0,546    | 0,5   | 0,5   |
| 92 | F | 15,00 | 423 | 0,466797 | 0,466797 | 0,5   | 0,9   |
| 93 | F | 13,00 | 132 | 0,488281 | 0,488281 | 1,25  | 1,25  |
| 94 | M | 11,00 | 288 | 0,488281 | 0,488281 | 0,625 | 0,625 |
| 95 | F | 11,00 | 288 | 0,488281 | 0,488281 | 0,625 | 0,625 |
| 96 | M | 11,00 | 834 | 0,537    | 0,537    | 0,5   | 0,5   |
| 97 | M | 16,00 | 282 | 0,589844 | 0,589844 | 0,625 | 0,625 |
| 98 | F | 17,00 | 73  | 0,488281 | 0,488281 | 2,5   | 2,5   |
| 99 | F | 13,00 | 335 | 0,488281 | 0,488281 | 0,625 | 0,625 |

|     |   |       |     |          |          |       |       |
|-----|---|-------|-----|----------|----------|-------|-------|
| 100 | F | 11,00 | 553 | 0,546    | 0,546    | 0,5   | 0,5   |
| 101 | M | 15,00 | 669 | 0,546    | 0,546    | 0,5   | 0,5   |
| 102 | F | 11,00 | 584 | 0,503    | 0,503    | 0,5   | 0,5   |
| 103 | F | 13,00 | 685 | 0,625    | 0,625    | 0,5   | 0,5   |
| 104 | M | 15,00 | 297 | 0,537109 | 0,537109 | 0,625 | 0,625 |
| 105 | M | 18,00 | 736 | 0,546    | 0,546    | 0,5   | 0,5   |
| 106 | F | 14,00 | 669 | 0,546    | 0,546    | 0,5   | 0,5   |
| 107 | M | 15,00 | 551 | 0,481    | 0,481    | 0,5   | 0,5   |
| 108 | M | 14,00 | 241 | 0,488281 | 0,488281 | 0,625 | 0,625 |
| 109 | F | 18,00 | 567 | 0,468    | 0,468    | 0,5   | 0,5   |
| 110 | F | 18,00 | 512 | 0,468    | 0,468    | 0,5   | 0,5   |
| 111 | M | 72,00 | 252 | 0,494141 | 0,494141 | 0,625 | 0,625 |
| 112 | M | 11    | 288 | 0,488281 | 0,488281 | 0,625 | 0,625 |
| 113 | F | 72,00 | 258 | 0,488281 | 0,488281 | 0,625 | 0,625 |
| 114 | F | 19,00 | 428 | 0,443359 | 0,443359 | 0,5   | 0,8   |
| 115 | M | 20,00 | 749 | 0,546    | 0,546    | 0,5   | 0,5   |
| 116 | F | 23,00 | 567 | 0,488    | 0,488    | 0,5   | 0,5   |
| 117 | M | 24,00 | 617 | 0,528    | 0,528    | 0,5   | 0,5   |
| 118 | M | 26,00 | 268 | 0,488281 | 0,488281 | 0,625 | 0,625 |
| 119 | M | 39,00 | 740 | 0,546    | 0,546    | 0,5   | 0,5   |
| 120 | F | 35,00 | 567 | 0,47     | 0,47     | 0,5   | 0,5   |
| 121 | M | 36,00 | 526 | 0,468    | 0,468    | 0,5   | 0,5   |
| 122 | F | 37,00 | 651 | 0,546    | 0,546    | 0,5   | 0,5   |
| 123 | M | 39,00 | 272 | 0,542969 | 0,542969 | 0,625 | 0,625 |
| 124 | M | 40,00 | 660 | 0,546    | 0,546    | 0,5   | 0,5   |
| 125 | F | 43,00 | 640 | 0,546    | 0,546    | 0,5   | 0,5   |
| 126 | M | 44,00 | 499 | 0,468    | 0,468    | 0,5   | 0,5   |
| 127 | M | 50,00 | 551 | 0,463    | 0,463    | 0,5   | 0,5   |
| 128 | F | 53,00 | 567 | 0,546    | 0,546    | 0,5   | 0,5   |
| 129 | F | 54,00 | 458 | 0,472656 | 0,472656 | 0,5   | 0,8   |
| 130 | M | 65,00 | 584 | 0,546    | 0,546    | 0,5   | 0,5   |
